# Supplementary figures and images for: Conditional knockdown of BCL2A1 reveals rate-limiting roles in BCR-dependent B-cell survival
Source: PubMed Central journal article supplement — Cell Death Differ. 2015 Oct 9;23(4):628–39. doi: 10.1038/cdd.2015.130 (PMC4986635; doi:10.1038/cdd.2015.130), 2015-10-09

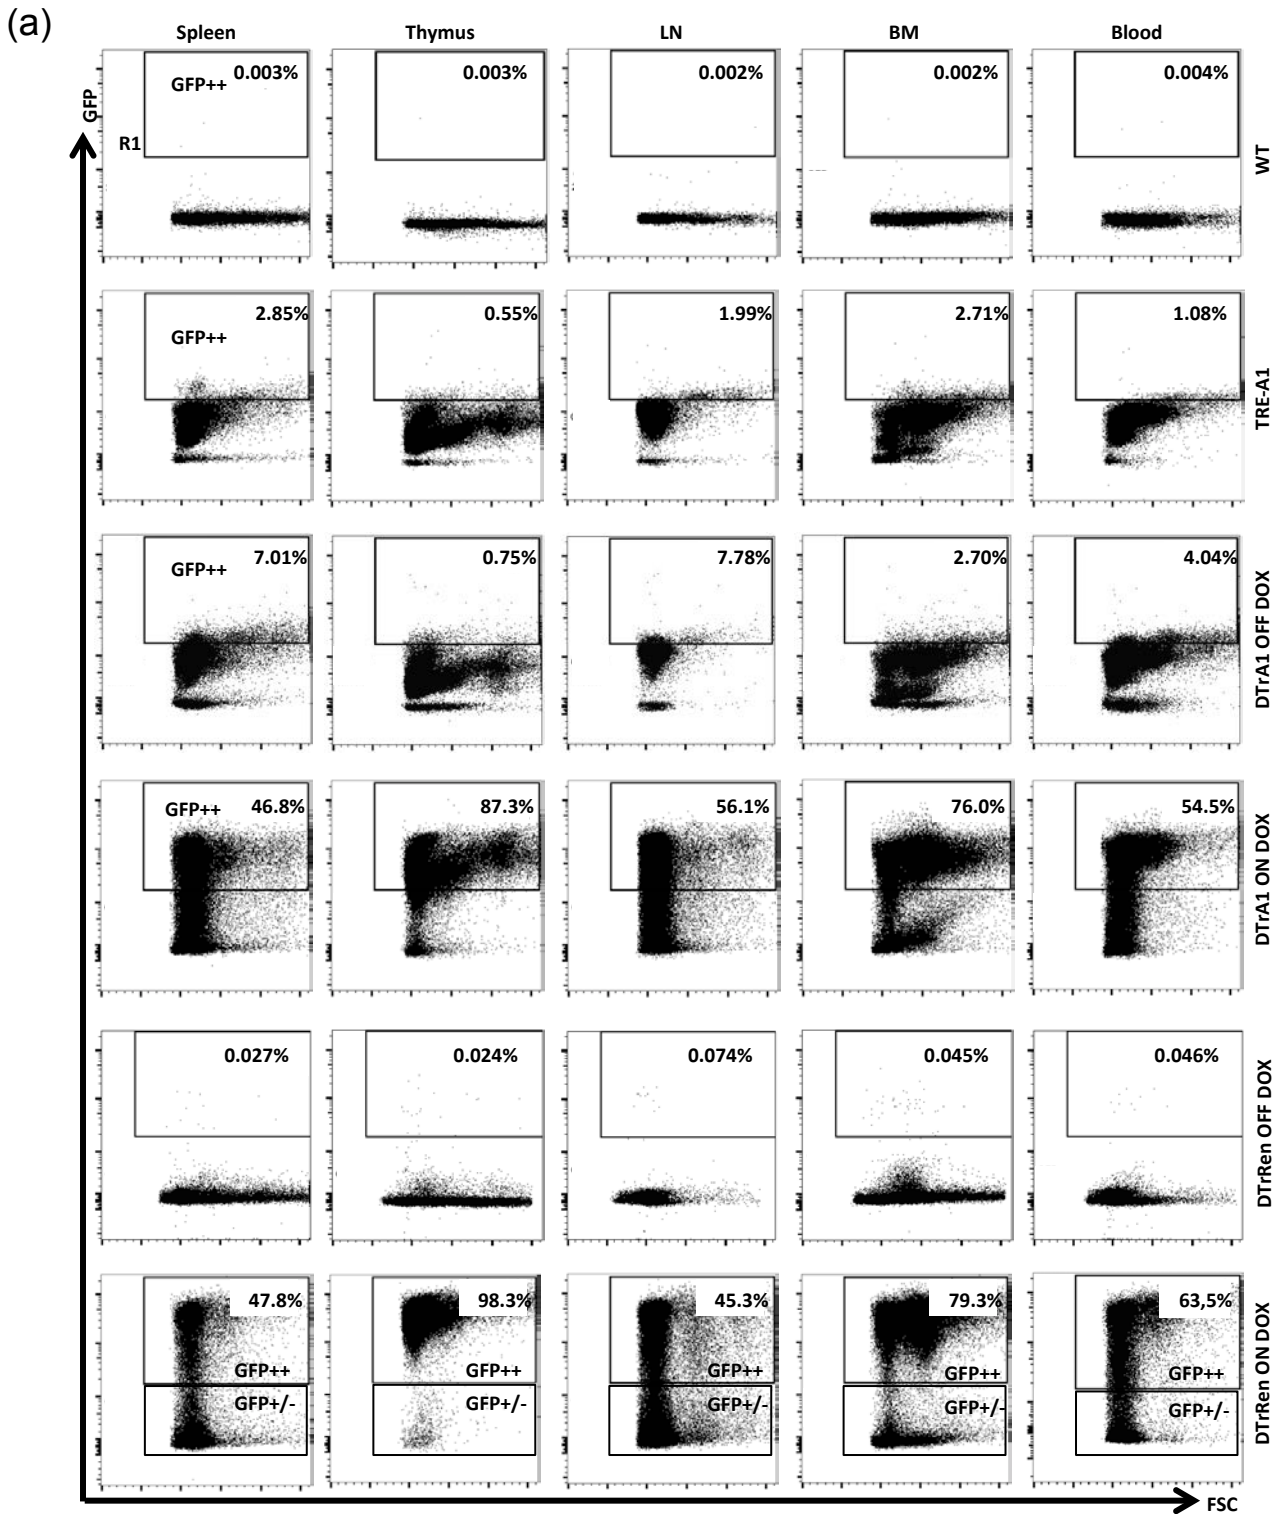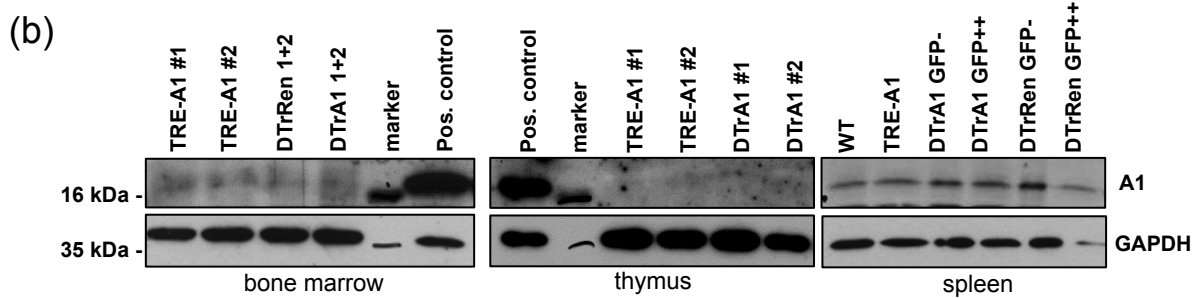

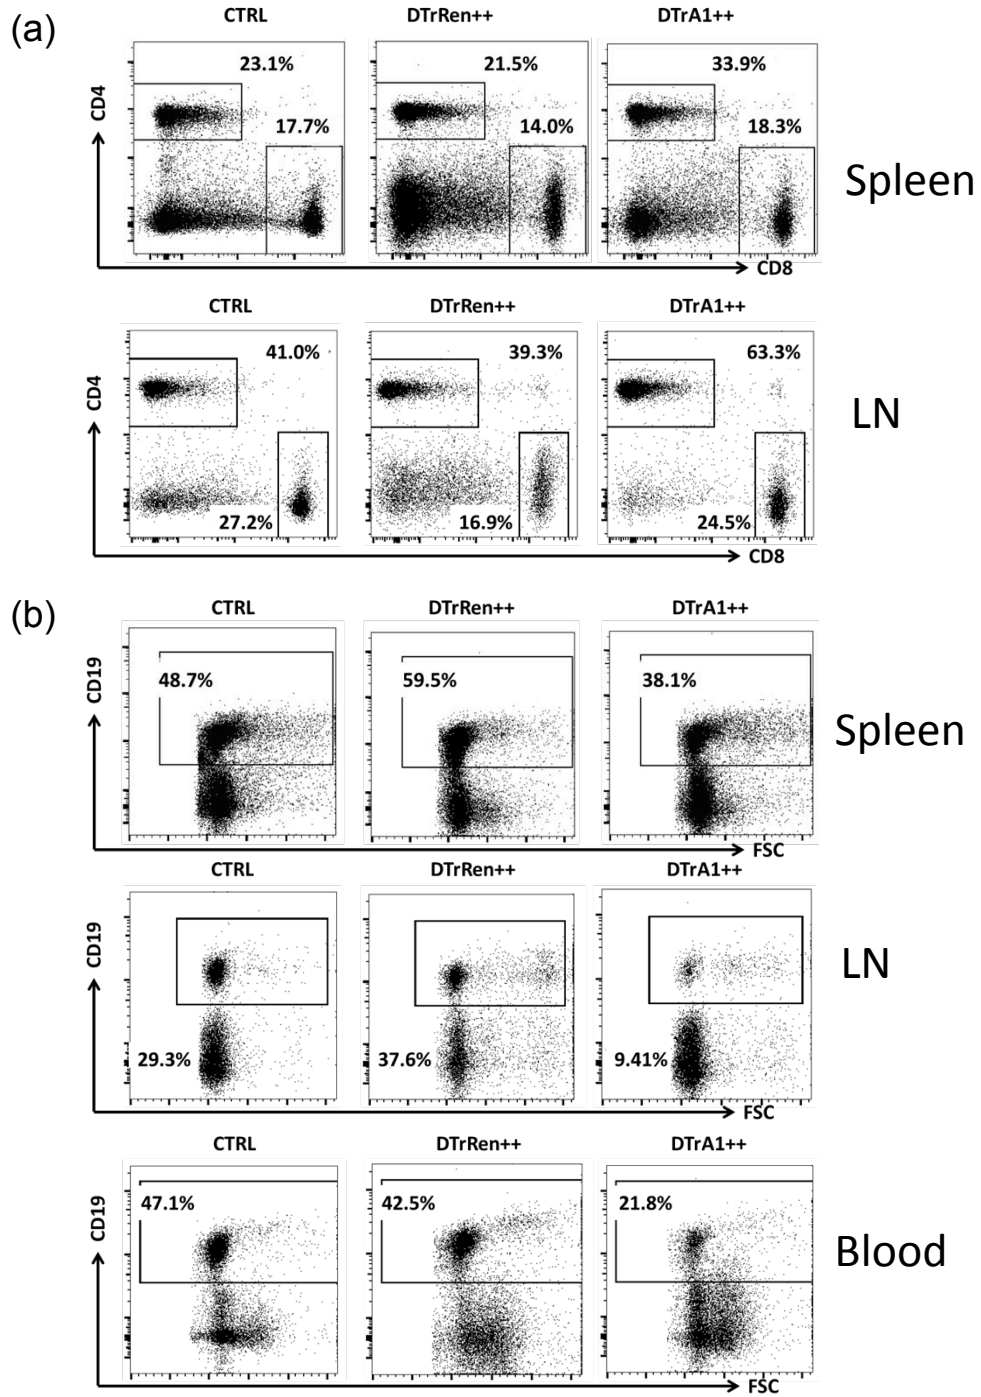

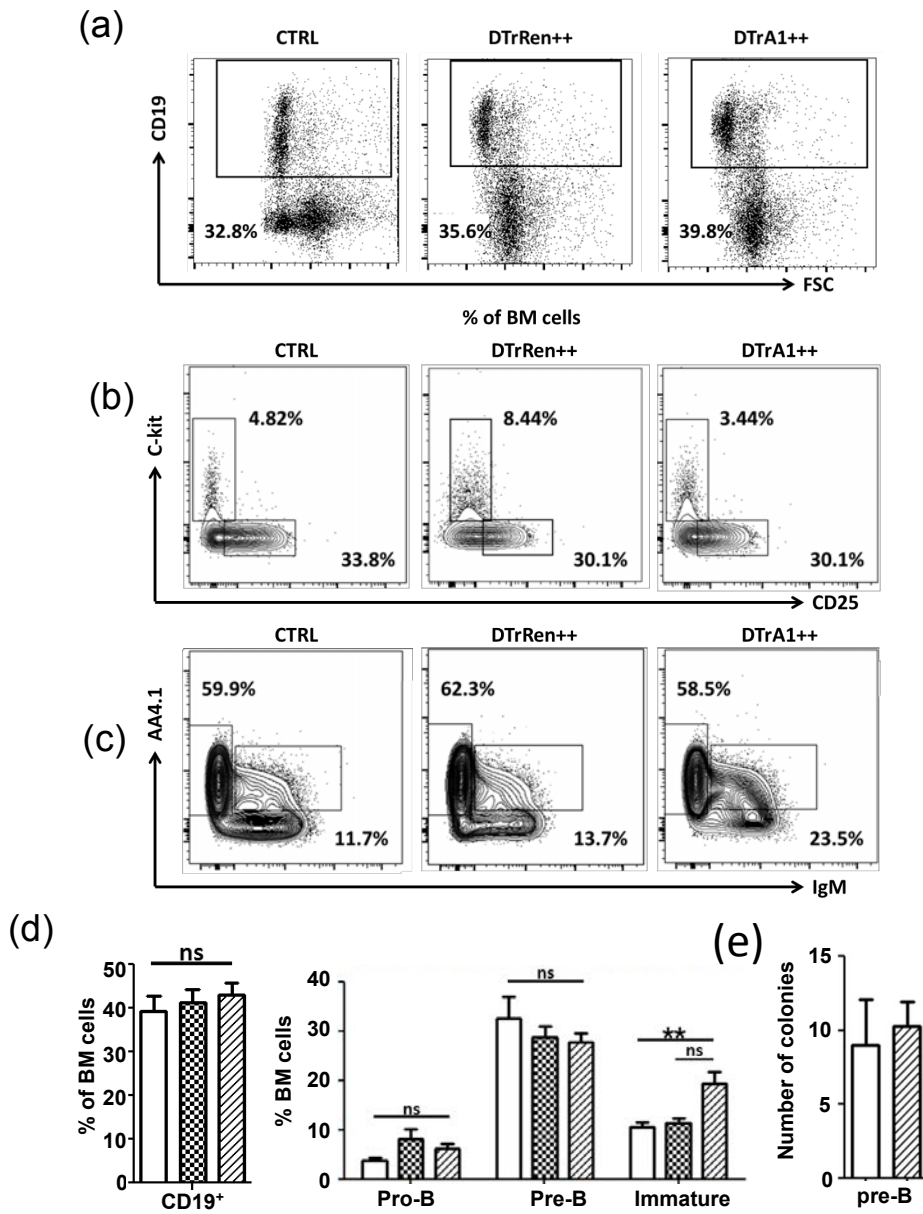

(a)

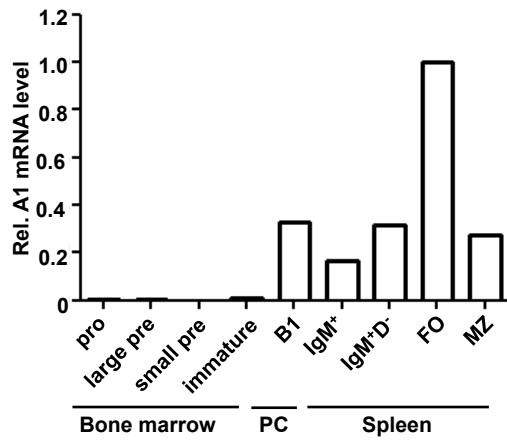

(b)

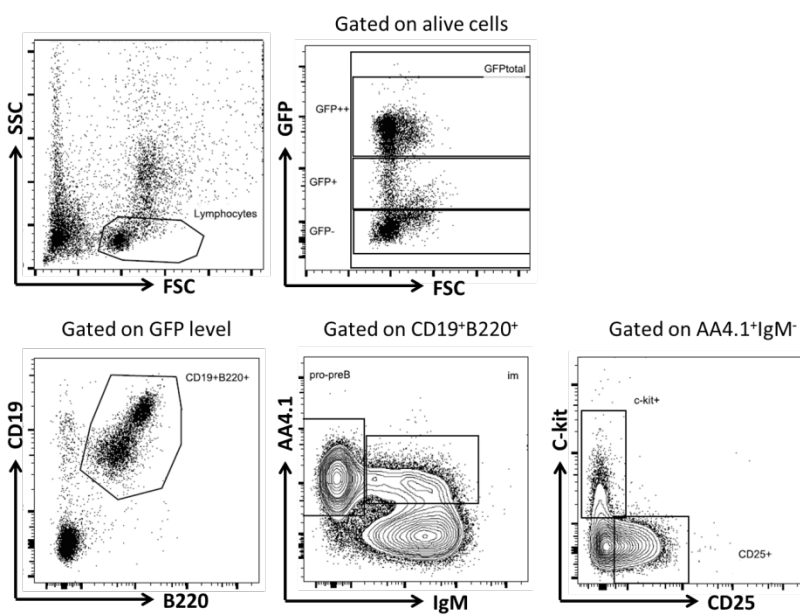

(c)

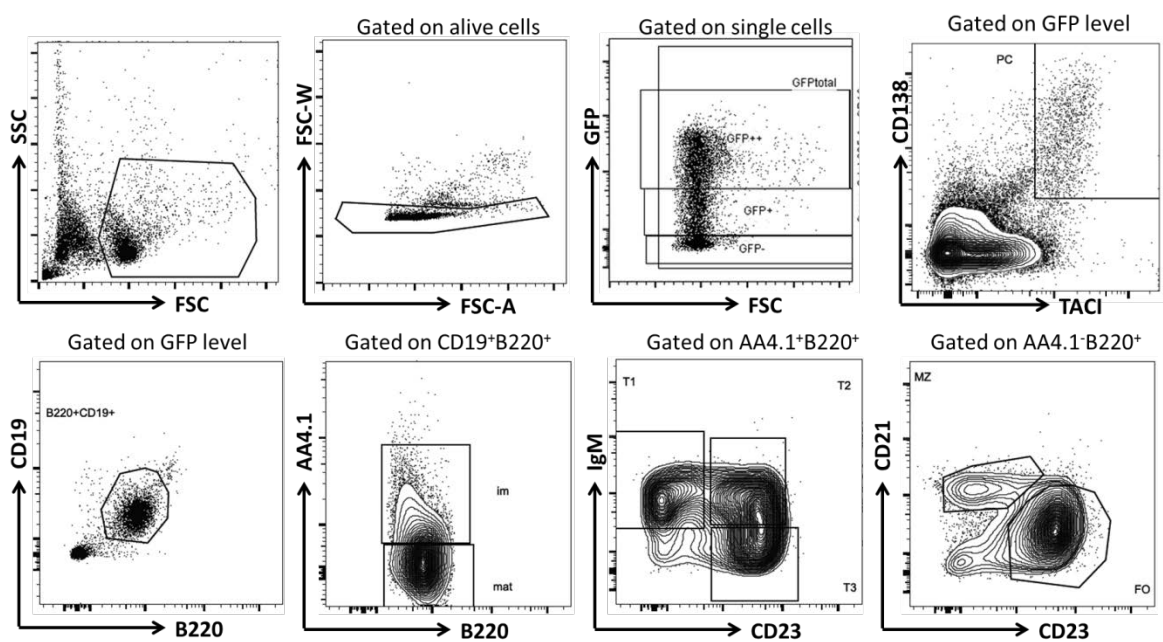

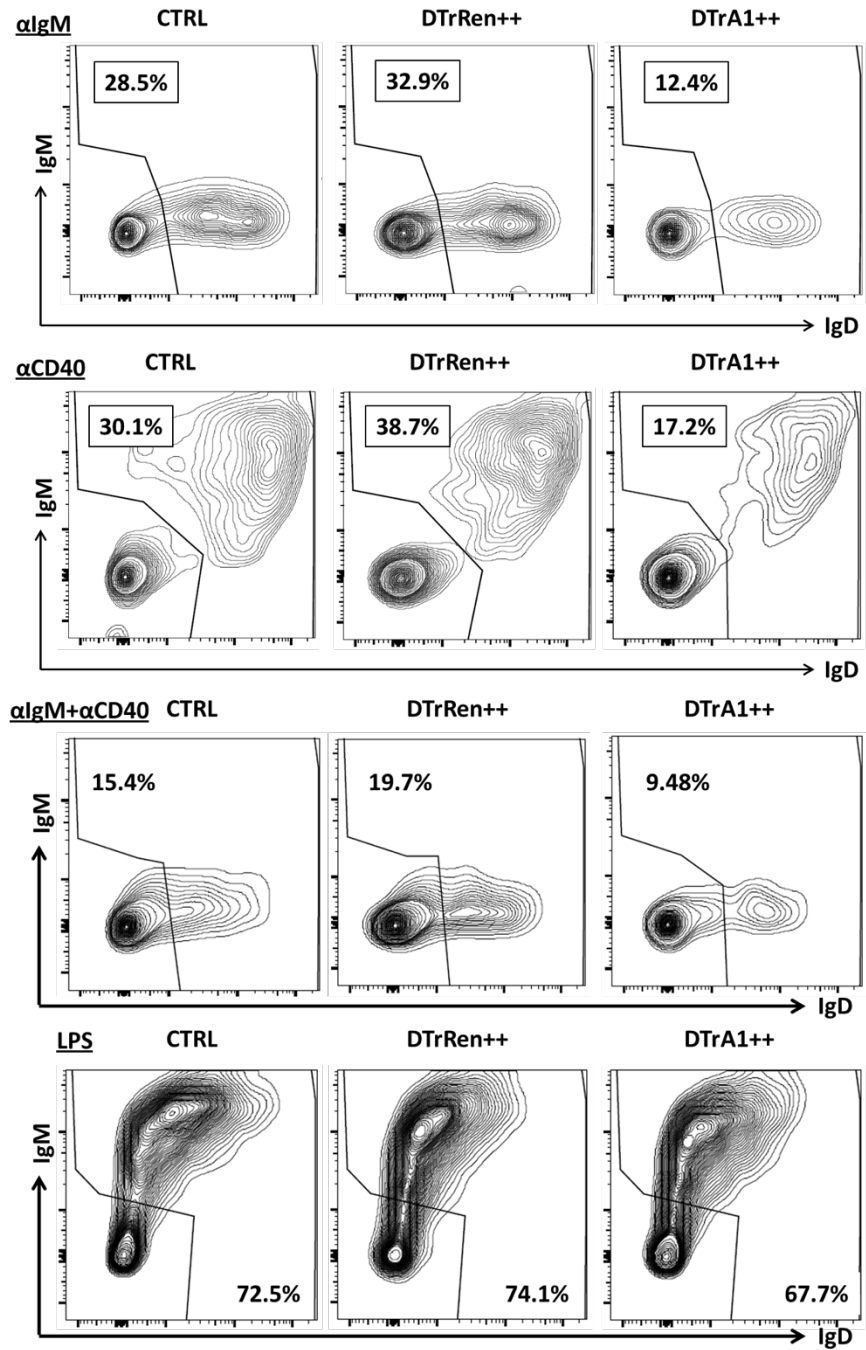



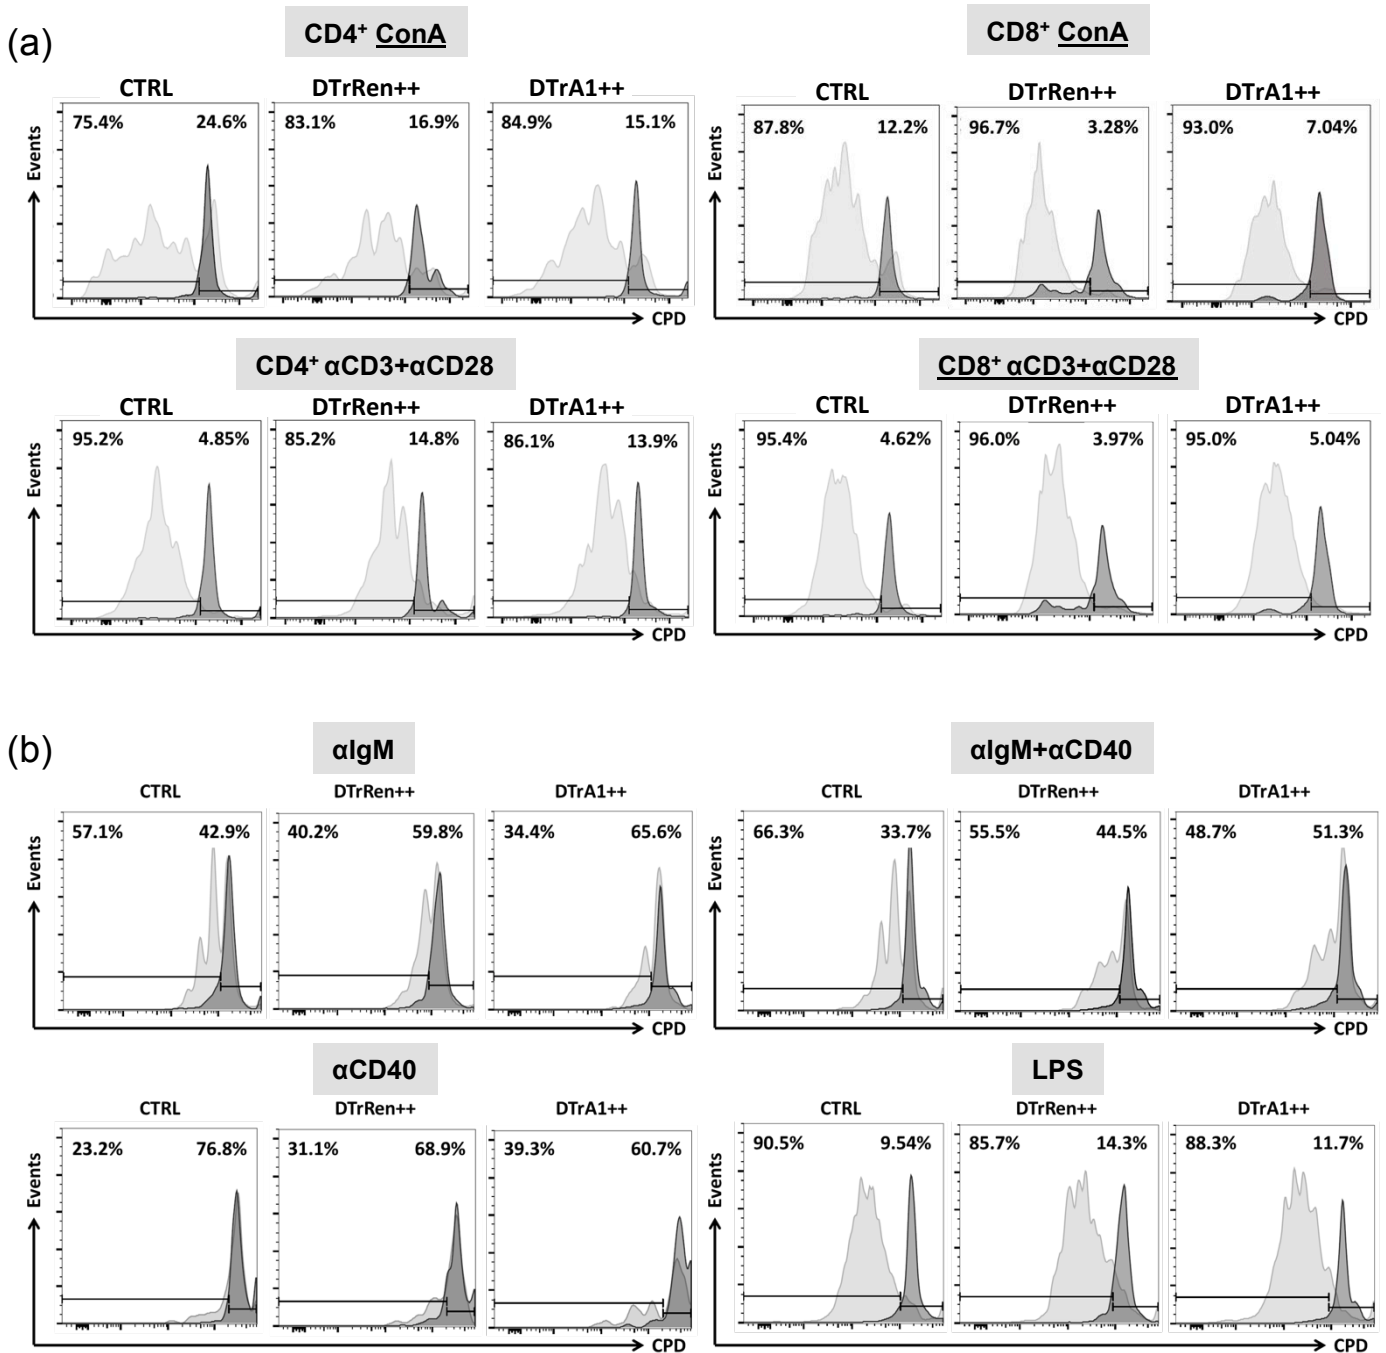

Supplement: cdd2015130x2.pdf [file cdd2015130x2.pdf]
